# Supplementary material for: Phytochemical Composition and Protective Effect of Vernonanthura polyanthes Leaf against In Vivo Doxorubicin-Mediated Toxicity
Source: MDPI journal article supplement (doi:10.3390/molecules27082553), 2022-04-15
Supplement: s1 [file s1]

# Phytochemical Composition and Protective Effect of *Vernonanthura polyanthes* leaf against in vivo doxorubicin-mediated toxicity

Jamira Dias Rocha <sup>1</sup>, Marilia Elias Gallon <sup>2</sup>, Abel Vieira de Melo Bisneto <sup>3</sup>, Vanessa Cristiane Santana Amaral <sup>1</sup>, Luciane Madureira de Almeida <sup>1</sup>, Leonardo Luiz Borges <sup>1,4</sup>, Lee Chen-Chen <sup>3</sup>, Leonardo Gobbo-Neto <sup>2</sup> and Elisa Flávia Luiz Cardoso Bailão <sup>1,\*</sup>

<sup>1</sup> Laboratório de Biotecnologia, Campus Central, Universidade Estadual de Goiás, Anápolis, GO, 75132-903, Brazil; jamiradias@gmail.com (J.D.R.); amaral.vcs@gmail.com (V.C.S.A.); luciane.almeida@ueg.br (L.M.d.A.); leonardo.borges@ueg.br (L.L.B.)

<sup>2</sup> Núcleo de Pesquisa em Produtos Naturais e Sintéticos de Ribeirão Preto, Universidade de São Paulo, Av. do Café s/n, Ribeirão Preto, SP, 14040-903, Brazil; mariliagallon@hotmail.com.br (M.E.G.); gobbo@fcfrp.usp.br (L.G.-N.)

<sup>3</sup> Laboratório de Radiobiologia e Mutagênese, Departamento de Genética, Instituto de Ciências Biológicas I, Universidade Federal de Goiás, Goiânia, GO, 74045-155, Brazil; abelmelo8@gmail.com (A.V.d.M.B.); chenleego@yahoo.com.br (L.C.-C.)

<sup>4</sup> Escola de Ciências Médicas e da Vida, Pontifícia Universidade Católica de Goiás, Goiânia GO, 74605-010, Brazil

\* Correspondence: elisa.flavia@ueg.br Tel.: +55 (62) 3328-1151

**Table S1.** Spectroscopic data of the putatively identified metabolites in *V. polyanthes* leaf aqueous extract (*VpLAE*) and its *n*-butanol fraction (*n*-BF).

| ID | Rt  | Usual name<br>(CAS number)                       | MF<br>(Monoisot.<br>Mass)                                     | Positive Ionization Mode                                                                                                     |                   | Negative Ionization Mode                                                                          |                                   | UV <sub>max</sub>        |
|----|-----|--------------------------------------------------|---------------------------------------------------------------|------------------------------------------------------------------------------------------------------------------------------|-------------------|---------------------------------------------------------------------------------------------------|-----------------------------------|--------------------------|
|    |     |                                                  |                                                               | TIC ( <i>m/z</i> )                                                                                                           | AIF               | TIC ( <i>m/z</i> )                                                                                | AIF                               |                          |
| 1  | 4.9 | 3- <i>O</i> -caffeoylquinic acid<br>(327-97-9)   | C <sub>16</sub> H <sub>18</sub> O <sub>9</sub><br>(354.0951)  | [M+H] <sup>+</sup> 355.1026 bp; [(M+H) – QA] <sup>+</sup> 163.0392                                                           | 163.04            | [M-H] <sup>-</sup> 353.0891 bp; [2M-H] <sup>-</sup> 707.1855                                      | 353.09; 191.06 bp; 179.03; 135.04 | 218; 244 sh; 296 sh; 324 |
| 2  | 6.0 | 5- <i>O</i> -caffeoylquinic acid<br>(906-33-2)   | C <sub>16</sub> H <sub>18</sub> O <sub>9</sub><br>(354.0951)  | [M+H] <sup>+</sup> 355.1027 bp; [(M+H) – QA] <sup>+</sup> 163.0391                                                           | 163.04            | [M-H] <sup>-</sup> 353.0891 bp; [2M-H] <sup>-</sup> 707.1863; [(M-H) – CAF] <sup>-</sup> 191.0559 | 353.09; 191.06 bp; 135.04         | 218; 244 sh; 295 sh; 326 |
| 3  | 6.2 | 4- <i>O</i> -caffeoylquinic acid<br>(87099-73-8) | C <sub>16</sub> H <sub>18</sub> O <sub>9</sub><br>(354.0951)  | [M+H] <sup>+</sup> 355.1027 bp; [(M+H) – QA] <sup>+</sup> 163.0392                                                           | 163.04            | [M-H] <sup>-</sup> 353.0880                                                                       | 191.06; 179.03; 173.04 bp; 135.04 | 219; 246 sh; 298 sh; 325 |
| 4  | 7.6 | 5- <i>O</i> -feruloylquinic acid<br>(62929-69-5) | C <sub>17</sub> H <sub>20</sub> O <sub>9</sub><br>(368.1107)  | [M+H] <sup>+</sup> 369.1178                                                                                                  | 177.05; 163.04 bp | [M-H] <sup>-</sup> 367.1046                                                                       | 191.05                            | 297; 326                 |
| 5  | 8.6 | quercetin 3- <i>O</i> -rutinoside<br>(153-18-4)  | C <sub>27</sub> H <sub>30</sub> O <sub>16</sub><br>(610.1534) | [M+H] <sup>+</sup> 611.1609 bp; [(M+H) – rhamnosil] <sup>+</sup> 465.1030; [(M+H) – rhamnosil-glycose] <sup>+</sup> 303.0498 | 303.05            | [M-H] <sup>-</sup> 609.1466 bp                                                                    | 609.15 bp; 301.03                 | 256; 266 sh; 355         |
| 6  | 9.4 | 3,4-di- <i>O</i> -caffeoylquinic acid            | C <sub>25</sub> H <sub>24</sub> O <sub>12</sub><br>(516.1268) | [M+H] <sup>+</sup> 517.1353 bp; [(M+H) – H <sub>2</sub> O] <sup>+</sup>                                                      | 163.04            | [M-H] <sup>-</sup> 515.1213                                                                       | 515.12; 353.09; 191.06; 179.03;   | 219; 243 sh; 297 sh; 321 |

| ID | Rt   | Usual name<br>(CAS number)                   | MF<br>(Monoisot.<br>Mass)                                     | Positive Ionization Mode                                                                                                                                 |        | Negative Ionization Mode    |                                           | UV <sub>max</sub>        |
|----|------|----------------------------------------------|---------------------------------------------------------------|----------------------------------------------------------------------------------------------------------------------------------------------------------|--------|-----------------------------|-------------------------------------------|--------------------------|
|    |      |                                              |                                                               | TIC ( <i>m/z</i> )                                                                                                                                       | AIF    | TIC ( <i>m/z</i> )          | AIF                                       |                          |
|    |      | (89886-30-6)                                 |                                                               | 499.1244; [(M+H) – CAF] <sup>+</sup> 355.1027; [(M+H) – QA-CAF] <sup>+</sup> 163.0387                                                                    |        |                             | 173.04 bp                                 |                          |
| 7  | 9.7  | 3,5-di-O-caffeoylquinic acid<br>(89919-62-0) | C <sub>25</sub> H <sub>24</sub> O <sub>12</sub><br>(516.1268) | [M+H] <sup>+</sup> 517.1382 bp. [(M+H) – H <sub>2</sub> O] <sup>+</sup> 499.1227; [(M+H) – QA-CAF] <sup>+</sup> 163.0394                                 | 163.04 | [M-H] <sup>-</sup> 515.1216 | 353.09; 191.06 bp; 179.03                 | 221; 244 sh; 296 sh; 325 |
| 8  | 10.2 | 4,5-di-O-caffeoylquinic acid<br>(89886-31-7) | C <sub>25</sub> H <sub>24</sub> O <sub>12</sub><br>(516.1268) | [M+H] <sup>+</sup> 517.1346 bp; [(M+H) – H <sub>2</sub> O] <sup>+</sup> 499.1228; [(M+H) – CAF] <sup>+</sup> 355.1027; [(M+H) -QA] <sup>+</sup> 163.0392 | 163.04 | [M-H] <sup>-</sup> 515.1213 | 515.12; 353.09; 191.06; 179.03; 173.04 bp | 219; 244 sh; 299 sh; 327 |

ID, peak identification; Rt, retention time in minutes; MF, molecular formular; Monoisot. Mass, monoisotopic mass; TIC, Total Ion Chromatogram; AIF, All Ion Fragmentation; UV<sub>max</sub>, wavelength of maximum absorption in the ultraviolet spectral region; sh, shoulder; QA, quinic acid; CAF, caffeoyl unit; bp, base peak.

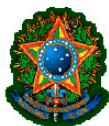

MINISTÉRIO DA EDUCAÇÃO  
UNIVERSIDADE FEDERAL DE GOIÁS  
PRÓ-REITORIA DE PESQUISA E INOVAÇÃO  
COMISSÃO DE ÉTICA NO USO DE ANIMAIS/CEUA

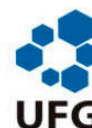

## CERTIFICADO

Certificamos que a proposta intitulada **ANÁLISE DAS FRAÇÕES DO EXTRATO AQUOSO DE FOLHAS DE *Vernonanthura polyanthes* QUE POTENCIALIZAM A GENOTOXICIDADE DA DOXORRUBICINA**, registrada com o protocolo nº 069/18, sob a responsabilidade de **JAMIRA DIAS ROCHA** que envolve a produção, manutenção ou utilização de animais pertencentes ao filo Chordata, subfilo Vertebrata (exceto humanos), para fins de pesquisa científica (ou ensino) - encontra-se de acordo com os preceitos da Lei nº 11.794, de 8 de outubro de 2008, do Decreto nº 6.899, de 15 de julho de 2009, e com as normas editadas pelo Conselho Nacional de Controle de Experimentação Animal (CONCEA), e foi aprovada pela COMISSÃO DE ÉTICA NO USO DE ANIMAIS (CEUA) da Universidade Federal de Goiás (UFG), em reunião de **17/09/2018**

- ☐ Finalidade: ( ) Ensino (X) Pesquisa Científica
- ☐ Vigência da autorização: 09/2018 a 03/2020
- ☐ Espécie/linhagem/raça: *Mus musculus*/Swiss Webster
- ☐ Nº de animais autorizados: 140
- ☐ Peso/Idade: 20 a 30 gramas, 7 a 12 semanas de idade
- ☐ Sexo: machos
- ☐ Origem (fornecedor): Biotério Central da Universidade Federal de Goiás

**Dra. Liliana Borges de Menezes Leite**  
Vice-Coordenadora da CEUA/PRPI/UFG

*Comissão de Ética no Uso de Animais/CEUA*

Pró-Reitoria de Pesquisa e Inovação/PRPI-UFG, Alameda Flamboyant, Qd. K, Edifício K2, 1º andar, Prédio da Agência de Inovação, Parque Tecnológico, sala da CEUA, Campus Samambaia – Goiânia-GO, Fone: (55-62) 3521-1876.  
Email: ceua.ufg@gmail.com
